# Supplementary material
Source: publisher figshare collection journal article supplement (https://acs.figshare.com/ndownloader/files/3973768)
Supplement: Supplementary file 1 [file 3973768]

data_global

_publ_contact_author_name         'Andrew D. Bond'
_publ_contact_author_address
;
University of Southern Denmark
Department of Physics and Chemistry
Campusvej 55
5230 Odense
Denmark
;

_publ_contact_author_email        adb@chem.sdu.dk
_publ_contact_author_fax          '+45 6615 8780'
_publ_contact_author_phone        '+45 6650 2545'

 
data_mb1102 
 
_audit_creation_method            SHELXL-97 
_chemical_name_systematic         ?
_chemical_name_common             055-fl
_chemical_melting_point           ? 
_chemical_formula_moiety          'C25 H19 N3 O2'
_chemical_formula_sum             'C25 H19 N3 O2'  
_chemical_formula_weight          393.43 
_chemical_absolute_configuration  unk
 
loop_ 
 _atom_type_symbol 
 _atom_type_description 
 _atom_type_scat_dispersion_real 
 _atom_type_scat_dispersion_imag 
 _atom_type_scat_source 
 'C'  'C'   0.0033   0.0016 
 'International Tables Vol C Tables 4.2.6.8 and 6.1.1.4' 
 'H'  'H'   0.0000   0.0000 
 'International Tables Vol C Tables 4.2.6.8 and 6.1.1.4' 
 'N'  'N'   0.0061   0.0033 
 'International Tables Vol C Tables 4.2.6.8 and 6.1.1.4' 
 'O'  'O'   0.0106   0.0060 
 'International Tables Vol C Tables 4.2.6.8 and 6.1.1.4' 
 
_symmetry_cell_setting            orthorhombic
_symmetry_space_group_name_H-M    'P c a 21'
_symmetry_space_group_name_Hall   'P 2c -2ac'
 
loop_ 
 _symmetry_equiv_pos_as_xyz 
 'x, y, z' 
 '-x, -y, z+1/2' 
 'x+1/2, -y, z' 
 '-x+1/2, y, z+1/2' 
 
_cell_length_a                    17.7097(9) 
_cell_length_b                    8.5590(4) 
_cell_length_c                    13.1023(6) 
_cell_angle_alpha                 90.00 
_cell_angle_beta                  90.00 
_cell_angle_gamma                 90.00 
_cell_volume                      1986.01(16) 
_cell_formula_units_Z             4 
_cell_measurement_temperature     150(2) 
_cell_measurement_reflns_used     9879
_cell_measurement_theta_min       2.30
_cell_measurement_theta_max       25.10
 
_exptl_crystal_description        block
_exptl_crystal_colour             yellow
_exptl_crystal_size_max           0.60 
_exptl_crystal_size_mid           0.60 
_exptl_crystal_size_min           0.50 
_exptl_crystal_density_meas       ? 
_exptl_crystal_density_diffrn     1.316 
_exptl_crystal_density_method     'not measured' 
_exptl_crystal_F_000              824 
_exptl_absorpt_coefficient_mu     0.085 
_exptl_absorpt_correction_type    multi-scan
_exptl_absorpt_correction_T_min   0.841
_exptl_absorpt_correction_T_max   0.959
_exptl_absorpt_process_details    'SADABS (Sheldrick, 2008)'
 
_exptl_special_details            ?
 
_diffrn_ambient_temperature       150(2) 
_diffrn_radiation_wavelength      0.71073 
_diffrn_radiation_type            MoK\a 
_diffrn_radiation_source          'fine-focus sealed tube' 
_diffrn_radiation_monochromator   graphite 
_diffrn_measurement_device_type   'Bruker Nonius X8APEX-II CCD'
_diffrn_measurement_method         '\w and \f scans'
_diffrn_standards_number          0
_diffrn_standards_interval_count  .
_diffrn_standards_interval_time   .
_diffrn_standards_decay_%         ?
_diffrn_reflns_number             22888 
_diffrn_reflns_av_R_equivalents   0.0263 
_diffrn_reflns_av_sigmaI/netI     0.0177 
_diffrn_reflns_limit_h_min        -21 
_diffrn_reflns_limit_h_max        20 
_diffrn_reflns_limit_k_min        -9 
_diffrn_reflns_limit_k_max        10 
_diffrn_reflns_limit_l_min        -12 
_diffrn_reflns_limit_l_max        15 
_diffrn_reflns_theta_min          3.66 
_diffrn_reflns_theta_max          25.15 
_diffrn_measured_fraction_theta_max    0.978 
_diffrn_reflns_theta_full              25.15 
_diffrn_measured_fraction_theta_full   0.978 
_reflns_number_total              3021 
_reflns_number_gt                 2920 
_reflns_threshold_expression      I>2\s(I)
 
_computing_data_collection        'APEX2 v2010.1-2 (Bruker, 2010)'
_computing_cell_refinement        'SAINT v.7.68a (Bruker, 2010)'
_computing_data_reduction         SAINT
_computing_structure_solution     'SHELXTL v.6.12 (Sheldrick, 2008)'
_computing_structure_refinement   SHELXTL
_computing_molecular_graphics     SHELXTL
_computing_publication_material   SHELXTL
 
_refine_special_details 
; 
 Refinement of F^2^ against ALL reflections.  The weighted R-factor wR and 
 goodness of fit S are based on F^2^, conventional R-factors R are based 
 on F, with F set to zero for negative F^2^. The threshold expression of 
 F^2^ > 2sigma(F^2^) is used only for calculating R-factors(gt) etc. and is 
 not relevant to the choice of reflections for refinement.  R-factors based 
 on F^2^ are statistically about twice as large as those based on F, and R- 
 factors based on ALL data will be even larger. 
; 
 
_refine_ls_structure_factor_coef  Fsqd  
_refine_ls_matrix_type            full 
_refine_ls_weighting_scheme       calc  
_refine_ls_weighting_details
 'calc w=1/[\s^2^(Fo^2^)+(0.0404P)^2^+0.2501P] where P=(Fo^2^+2Fc^2^)/3' 
_atom_sites_solution_primary      direct 
_atom_sites_solution_secondary    difmap 
_atom_sites_solution_hydrogens    geom 
_refine_ls_hydrogen_treatment     constr
_refine_ls_extinction_method      none 
_refine_ls_extinction_coef        ? 
_refine_ls_abs_structure_details
;
In the absence of significant anomalous scattering effects, the absolute
structure cannot be established. Friedel pairs have *not* been merged
;
_refine_ls_abs_structure_Flack    ?
_refine_ls_number_reflns          3021 
_refine_ls_number_parameters      271 
_refine_ls_number_restraints      1 
_refine_ls_R_factor_all           0.0270 
_refine_ls_R_factor_gt            0.0255 
_refine_ls_wR_factor_ref          0.0673 
_refine_ls_wR_factor_gt           0.0664 
_refine_ls_goodness_of_fit_ref    1.082 
_refine_ls_restrained_S_all       1.082 
_refine_ls_shift/su_max           0.000 
_refine_ls_shift/su_mean          0.000 
_refine_diff_density_max          0.168
_refine_diff_density_min          -0.157
_refine_diff_density_rms          0.032
 
loop_ 
 _atom_site_label 
 _atom_site_type_symbol 
 _atom_site_fract_x 
 _atom_site_fract_y 
 _atom_site_fract_z 
 _atom_site_U_iso_or_equiv 
 _atom_site_adp_type 
 _atom_site_occupancy 
 _atom_site_symmetry_multiplicity 
 _atom_site_calc_flag 
 _atom_site_refinement_flags 
 _atom_site_disorder_assembly 
 _atom_site_disorder_group 
O1 O 0.50794(6) 0.79249(14) 0.32216(11) 0.0388(3) Uani 1 1 d . . . 
O2 O 0.56411(7) 0.62451(15) 0.22580(11) 0.0459(3) Uani 1 1 d . . . 
N1 N 0.36212(8) -0.20229(16) 0.62705(12) 0.0386(3) Uani 1 1 d . . . 
N2 N 0.55029(8) 0.10830(17) 0.59530(12) 0.0365(3) Uani 1 1 d . . . 
N3 N 0.52070(7) 0.65857(18) 0.29488(11) 0.0313(3) Uani 1 1 d . . . 
C1 C 0.23514(8) 0.26908(16) 0.53034(11) 0.0206(3) Uani 1 1 d . . . 
H1A H 0.2323 0.3566 0.4799 0.025 Uiso 1 1 calc R . . 
C2 C 0.28391(8) 0.13733(16) 0.48308(11) 0.0206(3) Uani 1 1 d . . . 
H2A H 0.2693 0.0363 0.5159 0.025 Uiso 1 1 calc R . . 
C3 C 0.36738(8) 0.16243(16) 0.49967(11) 0.0212(3) Uani 1 1 d . . . 
C4 C 0.40943(8) 0.06068(17) 0.55453(11) 0.0225(3) Uani 1 1 d . . . 
C5 C 0.26287(8) 0.33454(18) 0.62957(12) 0.0249(3) Uani 1 1 d . . . 
H5A H 0.2996 0.2785 0.6676 0.030 Uiso 1 1 calc R . . 
C6 C 0.23674(9) 0.47067(18) 0.66556(12) 0.0286(4) Uani 1 1 d . . . 
H6A H 0.2617 0.5150 0.7229 0.034 Uiso 1 1 calc R . . 
C7 C 0.17380(9) 0.55425(18) 0.62376(13) 0.0314(4) Uani 1 1 d . . . 
H7A H 0.1758 0.6651 0.6254 0.038 Uiso 1 1 calc R . . 
C8 C 0.11182(9) 0.4873(2) 0.58220(13) 0.0335(4) Uani 1 1 d . . . 
H8A H 0.0728 0.5543 0.5585 0.040 Uiso 1 1 calc R . . 
C9 C 0.10095(9) 0.3218(2) 0.57137(12) 0.0301(4) Uani 1 1 d . . . 
H9A H 0.0508 0.2833 0.5768 0.036 Uiso 1 1 calc R . . 
C10 C 0.15587(8) 0.21771(18) 0.55427(12) 0.0257(3) Uani 1 1 d . . . 
H10A H 0.1446 0.1093 0.5573 0.031 Uiso 1 1 calc R . . 
C11 C 0.38049(8) -0.08286(19) 0.59602(11) 0.0258(3) Uani 1 1 d . . . 
C12 C 0.48814(9) 0.08768(17) 0.57552(12) 0.0259(3) Uani 1 1 d . . . 
C13 C 0.40704(8) 0.29485(17) 0.44832(11) 0.0221(3) Uani 1 1 d . . . 
C14 C 0.39530(8) 0.44979(17) 0.47655(12) 0.0235(3) Uani 1 1 d . . . 
H14A H 0.3611 0.4739 0.5302 0.028 Uiso 1 1 calc R . . 
C15 C 0.43319(8) 0.56857(17) 0.42676(12) 0.0256(3) Uani 1 1 d . . . 
H15A H 0.4259 0.6745 0.4461 0.031 Uiso 1 1 calc R . . 
C16 C 0.48184(8) 0.53043(18) 0.34840(12) 0.0259(3) Uani 1 1 d . . . 
C17 C 0.49567(9) 0.37847(18) 0.31908(13) 0.0280(4) Uani 1 1 d . . . 
H17A H 0.5302 0.3552 0.2657 0.034 Uiso 1 1 calc R . . 
C18 C 0.45750(8) 0.26074(19) 0.37008(12) 0.0267(3) Uani 1 1 d . . . 
H18A H 0.4659 0.1550 0.3513 0.032 Uiso 1 1 calc R . . 
C19 C 0.26796(8) 0.12437(17) 0.36620(11) 0.0228(3) Uani 1 1 d . . . 
H19A H 0.2807 0.2276 0.3348 0.027 Uiso 1 1 calc R . . 
C20 C 0.31495(8) 0.0022(2) 0.31342(12) 0.0274(3) Uani 1 1 d . . . 
H20A H 0.3508 0.0370 0.2644 0.033 Uiso 1 1 calc R . . 
C21 C 0.31013(9) -0.15077(19) 0.33016(12) 0.0311(4) Uani 1 1 d . . . 
H21A H 0.3480 -0.2137 0.2993 0.037 Uiso 1 1 calc R . . 
C22 C 0.25418(10) -0.23203(19) 0.38961(13) 0.0342(4) Uani 1 1 d . . . 
H22A H 0.2689 -0.3271 0.4213 0.041 Uiso 1 1 calc R . . 
C23 C 0.18256(10) -0.18353(19) 0.40368(13) 0.0319(4) Uani 1 1 d . . . 
H23A H 0.1505 -0.2490 0.4430 0.038 Uiso 1 1 calc R . . 
C24 C 0.15039(9) -0.04189(18) 0.36458(12) 0.0268(3) Uani 1 1 d . . . 
H24A H 0.0975 -0.0431 0.3523 0.032 Uiso 1 1 calc R . . 
C25 C 0.18633(8) 0.09159(17) 0.34345(11) 0.0244(3) Uani 1 1 d . . . 
H25A H 0.1580 0.1722 0.3115 0.029 Uiso 1 1 calc R . . 
 
loop_ 
 _atom_site_aniso_label 
 _atom_site_aniso_U_11 
 _atom_site_aniso_U_22 
 _atom_site_aniso_U_33 
 _atom_site_aniso_U_23 
 _atom_site_aniso_U_13 
 _atom_site_aniso_U_12 
O1 0.0325(6) 0.0302(7) 0.0537(8) 0.0093(5) 0.0019(5) -0.0074(5) 
O2 0.0378(7) 0.0534(8) 0.0465(8) 0.0077(6) 0.0172(6) -0.0094(6) 
N1 0.0524(9) 0.0264(8) 0.0370(8) 0.0033(6) 0.0005(7) 0.0014(7) 
N2 0.0263(8) 0.0390(8) 0.0440(9) -0.0022(6) -0.0051(6) 0.0069(6) 
N3 0.0204(7) 0.0385(9) 0.0349(8) 0.0073(6) -0.0005(6) -0.0068(6) 
C1 0.0210(8) 0.0196(7) 0.0213(8) 0.0033(6) 0.0008(5) 0.0000(6) 
C2 0.0205(7) 0.0201(8) 0.0212(7) 0.0032(6) 0.0000(5) -0.0010(6) 
C3 0.0222(8) 0.0212(8) 0.0201(7) -0.0039(6) 0.0023(6) 0.0007(6) 
C4 0.0227(8) 0.0214(8) 0.0235(8) -0.0018(6) -0.0015(6) 0.0028(6) 
C5 0.0222(8) 0.0304(8) 0.0223(7) 0.0021(6) 0.0012(6) -0.0034(6) 
C6 0.0320(9) 0.0311(9) 0.0228(8) -0.0042(6) 0.0042(6) -0.0077(7) 
C7 0.0411(10) 0.0243(8) 0.0288(8) -0.0033(6) 0.0069(7) 0.0025(7) 
C8 0.0328(9) 0.0361(10) 0.0316(9) -0.0022(7) 0.0035(7) 0.0108(7) 
C9 0.0209(8) 0.0378(10) 0.0315(9) -0.0049(7) 0.0036(6) -0.0013(7) 
C10 0.0231(8) 0.0285(8) 0.0253(8) -0.0027(6) 0.0012(6) -0.0049(7) 
C11 0.0282(8) 0.0257(9) 0.0236(8) -0.0014(6) -0.0017(6) 0.0059(7) 
C12 0.0269(9) 0.0207(8) 0.0302(9) -0.0016(6) -0.0015(6) 0.0064(6) 
C13 0.0164(7) 0.0251(8) 0.0249(8) 0.0032(6) -0.0041(6) 0.0004(6) 
C14 0.0188(7) 0.0254(8) 0.0264(8) 0.0012(6) -0.0001(5) 0.0000(6) 
C15 0.0200(8) 0.0245(8) 0.0323(9) 0.0014(6) -0.0016(6) -0.0015(6) 
C16 0.0188(7) 0.0295(8) 0.0293(9) 0.0069(6) -0.0033(6) -0.0057(6) 
C17 0.0196(7) 0.0350(10) 0.0295(8) -0.0001(7) 0.0039(6) -0.0013(6) 
C18 0.0212(8) 0.0264(8) 0.0324(8) 0.0001(6) 0.0012(6) 0.0012(6) 
C19 0.0217(8) 0.0243(8) 0.0224(8) 0.0032(6) 0.0009(6) -0.0008(6) 
C20 0.0201(7) 0.0392(10) 0.0229(8) -0.0050(6) -0.0012(6) 0.0009(6) 
C21 0.0284(8) 0.0349(10) 0.0299(9) -0.0111(7) -0.0042(6) 0.0085(7) 
C22 0.0404(10) 0.0244(8) 0.0379(10) -0.0038(7) -0.0086(7) 0.0013(8) 
C23 0.0358(10) 0.0282(9) 0.0316(9) -0.0008(7) -0.0028(7) -0.0071(7) 
C24 0.0225(8) 0.0332(9) 0.0246(8) -0.0032(6) -0.0009(6) -0.0021(7) 
C25 0.0226(8) 0.0306(9) 0.0200(8) -0.0006(6) -0.0009(6) 0.0029(6) 
 
_geom_special_details 
; 
 All esds (except the esd in the dihedral angle between two l.s. planes) 
 are estimated using the full covariance matrix.  The cell esds are taken 
 into account individually in the estimation of esds in distances, angles 
 and torsion angles; correlations between esds in cell parameters are only 
 used when they are defined by crystal symmetry.  An approximate (isotropic) 
 treatment of cell esds is used for estimating esds involving l.s. planes. 
; 
 
loop_ 
 _geom_bond_atom_site_label_1 
 _geom_bond_atom_site_label_2 
 _geom_bond_distance 
 _geom_bond_site_symmetry_2 
 _geom_bond_publ_flag 
O1 N3 1.2217(18) . ? 
O2 N3 1.2228(19) . ? 
N1 C11 1.147(2) . ? 
N2 C12 1.144(2) . ? 
N3 C16 1.473(2) . ? 
C1 C5 1.498(2) . ? 
C1 C10 1.504(2) . ? 
C1 C2 1.550(2) . ? 
C1 H1A 1.0000 . ? 
C2 C3 1.510(2) . ? 
C2 C19 1.561(2) . ? 
C2 H2A 1.0000 . ? 
C3 C4 1.353(2) . ? 
C3 C13 1.494(2) . ? 
C4 C11 1.438(2) . ? 
C4 C12 1.439(2) . ? 
C5 C6 1.339(2) . ? 
C5 H5A 0.9500 . ? 
C6 C7 1.433(2) . ? 
C6 H6A 0.9500 . ? 
C7 C8 1.353(2) . ? 
C7 H7A 0.9500 . ? 
C8 C9 1.436(3) . ? 
C8 H8A 0.9500 . ? 
C9 C10 1.338(2) . ? 
C9 H9A 0.9500 . ? 
C10 H10A 0.9500 . ? 
C13 C18 1.391(2) . ? 
C13 C14 1.392(2) . ? 
C14 C15 1.382(2) . ? 
C14 H14A 0.9500 . ? 
C15 C16 1.379(2) . ? 
C15 H15A 0.9500 . ? 
C16 C17 1.378(2) . ? 
C17 C18 1.385(2) . ? 
C17 H17A 0.9500 . ? 
C18 H18A 0.9500 . ? 
C19 C25 1.503(2) . ? 
C19 C20 1.505(2) . ? 
C19 H19A 1.0000 . ? 
C20 C21 1.331(2) . ? 
C20 H20A 0.9500 . ? 
C21 C22 1.439(3) . ? 
C21 H21A 0.9500 . ? 
C22 C23 1.347(3) . ? 
C22 H22A 0.9500 . ? 
C23 C24 1.434(2) . ? 
C23 H23A 0.9500 . ? 
C24 C25 1.337(2) . ? 
C24 H24A 0.9500 . ? 
C25 H25A 0.9500 . ? 
 
loop_ 
 _geom_angle_atom_site_label_1 
 _geom_angle_atom_site_label_2 
 _geom_angle_atom_site_label_3 
 _geom_angle 
 _geom_angle_site_symmetry_1 
 _geom_angle_site_symmetry_3 
 _geom_angle_publ_flag 
O1 N3 O2 123.81(14) . . ? 
O1 N3 C16 118.23(13) . . ? 
O2 N3 C16 117.95(14) . . ? 
C5 C1 C10 103.55(11) . . ? 
C5 C1 C2 115.85(11) . . ? 
C10 C1 C2 113.01(12) . . ? 
C5 C1 H1A 108.0 . . ? 
C10 C1 H1A 108.0 . . ? 
C2 C1 H1A 108.0 . . ? 
C3 C2 C1 112.63(11) . . ? 
C3 C2 C19 109.18(11) . . ? 
C1 C2 C19 110.05(11) . . ? 
C3 C2 H2A 108.3 . . ? 
C1 C2 H2A 108.3 . . ? 
C19 C2 H2A 108.3 . . ? 
C4 C3 C13 117.97(13) . . ? 
C4 C3 C2 121.60(13) . . ? 
C13 C3 C2 120.24(12) . . ? 
C3 C4 C11 123.69(13) . . ? 
C3 C4 C12 122.09(14) . . ? 
C11 C4 C12 114.22(13) . . ? 
C6 C5 C1 121.16(13) . . ? 
C6 C5 H5A 119.4 . . ? 
C1 C5 H5A 119.4 . . ? 
C5 C6 C7 124.64(15) . . ? 
C5 C6 H6A 117.7 . . ? 
C7 C6 H6A 117.7 . . ? 
C8 C7 C6 124.99(14) . . ? 
C8 C7 H7A 117.5 . . ? 
C6 C7 H7A 117.5 . . ? 
C7 C8 C9 124.49(15) . . ? 
C7 C8 H8A 117.8 . . ? 
C9 C8 H8A 117.8 . . ? 
C10 C9 C8 125.17(15) . . ? 
C10 C9 H9A 117.4 . . ? 
C8 C9 H9A 117.4 . . ? 
C9 C10 C1 121.23(13) . . ? 
C9 C10 H10A 119.4 . . ? 
C1 C10 H10A 119.4 . . ? 
N1 C11 C4 175.13(16) . . ? 
N2 C12 C4 177.91(17) . . ? 
C18 C13 C14 119.46(14) . . ? 
C18 C13 C3 118.35(13) . . ? 
C14 C13 C3 122.19(13) . . ? 
C15 C14 C13 120.18(14) . . ? 
C15 C14 H14A 119.9 . . ? 
C13 C14 H14A 119.9 . . ? 
C16 C15 C14 118.72(14) . . ? 
C16 C15 H15A 120.6 . . ? 
C14 C15 H15A 120.6 . . ? 
C17 C16 C15 122.81(14) . . ? 
C17 C16 N3 119.15(14) . . ? 
C15 C16 N3 118.04(14) . . ? 
C16 C17 C18 117.73(14) . . ? 
C16 C17 H17A 121.1 . . ? 
C18 C17 H17A 121.1 . . ? 
C17 C18 C13 121.09(15) . . ? 
C17 C18 H18A 119.5 . . ? 
C13 C18 H18A 119.5 . . ? 
C25 C19 C20 108.13(12) . . ? 
C25 C19 C2 112.45(12) . . ? 
C20 C19 C2 113.59(12) . . ? 
C25 C19 H19A 107.5 . . ? 
C20 C19 H19A 107.5 . . ? 
C2 C19 H19A 107.5 . . ? 
C21 C20 C19 124.93(14) . . ? 
C21 C20 H20A 117.5 . . ? 
C19 C20 H20A 117.5 . . ? 
C20 C21 C22 127.51(15) . . ? 
C20 C21 H21A 116.2 . . ? 
C22 C21 H21A 116.2 . . ? 
C23 C22 C21 124.97(15) . . ? 
C23 C22 H22A 117.5 . . ? 
C21 C22 H22A 117.5 . . ? 
C22 C23 C24 125.84(16) . . ? 
C22 C23 H23A 117.1 . . ? 
C24 C23 H23A 117.1 . . ? 
C25 C24 C23 127.40(14) . . ? 
C25 C24 H24A 116.3 . . ? 
C23 C24 H24A 116.3 . . ? 
C24 C25 C19 125.21(14) . . ? 
C24 C25 H25A 117.4 . . ? 
C19 C25 H25A 117.4 . . ? 
 
loop_ 
 _geom_torsion_atom_site_label_1 
 _geom_torsion_atom_site_label_2 
 _geom_torsion_atom_site_label_3 
 _geom_torsion_atom_site_label_4 
 _geom_torsion 
 _geom_torsion_site_symmetry_1 
 _geom_torsion_site_symmetry_2 
 _geom_torsion_site_symmetry_3 
 _geom_torsion_site_symmetry_4 
 _geom_torsion_publ_flag 
C5 C1 C2 C3 -36.59(16) . . . . ? 
C10 C1 C2 C3 -155.84(12) . . . . ? 
C5 C1 C2 C19 -158.66(12) . . . . ? 
C10 C1 C2 C19 82.09(14) . . . . ? 
C1 C2 C3 C4 117.38(15) . . . . ? 
C19 C2 C3 C4 -120.06(15) . . . . ? 
C1 C2 C3 C13 -67.60(16) . . . . ? 
C19 C2 C3 C13 54.97(16) . . . . ? 
C13 C3 C4 C11 -171.18(13) . . . . ? 
C2 C3 C4 C11 4.0(2) . . . . ? 
C13 C3 C4 C12 8.3(2) . . . . ? 
C2 C3 C4 C12 -176.56(13) . . . . ? 
C10 C1 C5 C6 -71.58(16) . . . . ? 
C2 C1 C5 C6 164.12(14) . . . . ? 
C1 C5 C6 C7 9.7(2) . . . . ? 
C5 C6 C7 C8 34.5(3) . . . . ? 
C6 C7 C8 C9 -1.8(3) . . . . ? 
C7 C8 C9 C10 -32.8(3) . . . . ? 
C8 C9 C10 C1 -8.5(3) . . . . ? 
C5 C1 C10 C9 70.49(17) . . . . ? 
C2 C1 C10 C9 -163.38(15) . . . . ? 
C4 C3 C13 C18 65.69(19) . . . . ? 
C2 C3 C13 C18 -109.52(15) . . . . ? 
C4 C3 C13 C14 -114.03(16) . . . . ? 
C2 C3 C13 C14 70.77(18) . . . . ? 
C18 C13 C14 C15 0.4(2) . . . . ? 
C3 C13 C14 C15 -179.91(13) . . . . ? 
C13 C14 C15 C16 0.7(2) . . . . ? 
C14 C15 C16 C17 -1.5(2) . . . . ? 
C14 C15 C16 N3 178.89(13) . . . . ? 
O1 N3 C16 C17 -179.74(14) . . . . ? 
O2 N3 C16 C17 0.0(2) . . . . ? 
O1 N3 C16 C15 -0.2(2) . . . . ? 
O2 N3 C16 C15 179.62(15) . . . . ? 
C15 C16 C17 C18 1.2(2) . . . . ? 
N3 C16 C17 C18 -179.19(13) . . . . ? 
C16 C17 C18 C13 -0.1(2) . . . . ? 
C14 C13 C18 C17 -0.7(2) . . . . ? 
C3 C13 C18 C17 179.60(13) . . . . ? 
C3 C2 C19 C25 177.29(12) . . . . ? 
C1 C2 C19 C25 -58.62(15) . . . . ? 
C3 C2 C19 C20 54.06(16) . . . . ? 
C1 C2 C19 C20 178.16(12) . . . . ? 
C25 C19 C20 C21 -59.87(19) . . . . ? 
C2 C19 C20 C21 65.68(19) . . . . ? 
C19 C20 C21 C22 9.0(3) . . . . ? 
C20 C21 C22 C23 28.8(3) . . . . ? 
C21 C22 C23 C24 -1.7(3) . . . . ? 
C22 C23 C24 C25 -28.0(3) . . . . ? 
C23 C24 C25 C19 -6.1(3) . . . . ? 
C20 C19 C25 C24 57.71(19) . . . . ? 
C2 C19 C25 C24 -68.52(19) . . . . ? 
 
